# Influenza A virus defective viral genomes are inefficiently packaged into virions relative to wild-type genomic RNAs

Fadi G. Alnaji<sup>a</sup>, William K. Reiser<sup>a</sup>, Aartjan te Velthuis<sup>b</sup>, Christopher B. Brooke<sup>a,c</sup> #

<sup>a</sup> Department of Microbiology, University of Illinois at Urbana-Champaign

<sup>b</sup> Lewis Thomas Laboratory, Department of Molecular Biology, Princeton University

<sup>c</sup> Carl R. Woese Institute for Genomic Biology, University of Illinois at Urbana-Champaign

#Corresponding author (cbrooke@illinois.edu)

## Abstract

Deletion-containing viral genomes (DeIVGs) are commonly produced during influenza A virus infection and have been implicated in influencing clinical infection outcomes. Despite their ubiquity, the specific molecular mechanisms that govern DeIVG formation and their packaging into defective interfering particles (DIPs) remain poorly understood. Here, we utilized next-generation sequencing to analyze DeIVGs that form *de novo* early during infection, prior to packaging. Analysis of these early DeIVGs revealed that deletion formation occurs in clearly defined hotspots and is significantly associated with both direct sequence repeats and enrichment of adenosine and uridine bases. By comparing intracellular DeIVGs with those packaged into extracellular virions, we discovered that DeIVGs face a significant bottleneck during genome packaging relative to wild type genomic RNAs. Surprisingly, packaged DeIVGs exhibited no signs of enrichment for specific deletion characteristics suggesting that all DeIVGs are equally limited in packaging efficiency. Our data provide the first unbiased, high-resolution portrait of the diversity of DeIVGs that are generated by the IAV replication machinery and shed light on the mechanisms that underly DeIVG formation.

## Importance

Defective interfering particles (DIPs) are commonly produced by RNA viruses and have been implicated in modulating clinical infection outcomes, hence, there is increasing interest in the potential of DIPs as antiviral therapeutics. For influenza viruses, DIPs are formed by the packaging of genomic RNAs harboring internal deletions. Despite decades of study, the mechanisms that drive the formation of these deletion-containing viral genomes (DeIVGs) remain elusive. Here, we used a specialized sequencing pipeline to characterize the first wave of DeIVGs that form during influenza virus infection. This dataset provides an unbiased profile of the deletion-forming preferences of the influenza virus replicase. Additionally, by comparing the early intracellular DeIVGs with those that get packaged into extracellular virions, we described a significant segment-specific bottleneck that limits DeIVG packaging relative to wild type viral RNAs. Altogether, these findings reveal factors that govern the production of both DeIVGs and DIPs during influenza virus infection.

## 47 INTRODUCTION

48 Influenza A virus (IAV) populations are highly heterogeneous and largely consist of virions  
49 that lack functional copies of one or more gene segments (1, 2). A major contributor to  
50 this heterogeneity is the common presence of defective interfering particles (DIPs) within  
51 viral populations. DIPs are virions that harbor a large deletion in one or more genome  
52 segments, resulting in an inability to express the full set of viral proteins required for  
53 productive replication. DIPs have been demonstrated in numerous contexts to interfere  
54 with wild-type virus replication (hence the name), ostensibly either by outcompeting wild  
55 type genomes for replication and packaging and/or by triggering innate immune activation  
56 (3–7). Recent studies have correlated the abundance of DIPs within clinical samples with  
57 severity of both IAV and RSV infection, suggesting a role for DIPs in modulating viral  
58 pathogenicity (8, 9). Despite being discovered over 60 years ago, the specific molecular  
59 processes that drive DIP formation, as well as the effects of DIPs on the collective  
60 behavior and pathogenicity of viral populations remain mysterious (10, 11).

61  
62 The deletion-containing genomic RNAs carried by DIPs are commonly referred to as  
63 defective viral genomes (DVGs) (3). This terminology is complicated for influenza viruses,  
64 as a variety of distinct defective viral genome species have been described, including  
65 hyper-mutated segments (12) and mini viral RNAs (mvRNAs), which carry enormous  
66 deletions and do not get packaged into virions (13). In addition, it is not yet clear that the  
67 production of some deletion-containing segments is actually detrimental to viral  
68 population fitness (11). Thus, to minimize confusion, we use the term DelVG (Deletion-  
69 containing Viral Genome) here to refer to any viral gene segments that contain deletions  
70 greater than 10 nucleotides, yet retain the classical viral packaging signals.

71  
72 Next generation sequencing (NGS) represents a powerful new tool for revealing the  
73 specific processes and molecular determinants that underly DelVG formation (14–17).  
74 The analysis of large numbers of individual DelVGs can reveal specific patterns that yield  
75 mechanistic insight into the formation process (18). IAV DelVGs are typically studied in  
76 the context of extracellular DIPs. A potential limitation of this approach for investigating  
77 the DelVG formation process is that the requirements of intracellular trafficking and  
78 packaging may specifically select for a subset of the total repertoire of DelVGs produced  
79 within the cell (19). As a result, DelVGs isolated from extracellular DIPs may not be  
80 representative of the full range of DelVG products produced within the infected cell. Such  
81 a discrepancy between the DelVGs present within an infected cell and those that get  
82 packaged into DIPs was recently described for chikungunya virus (20).

83  
84 To gain a more accurate, comprehensive understanding of DelVG and DIP formation, we  
85 specifically examined the DelVGs that formed *de novo* during the first hours of IAV  
86 infection. Careful analysis of hundreds of intracellular and extracellular DelVGs revealed  
87 the enrichment of specific sequence elements at deletion breakpoints. We also observed  
88 that DelVGs represent a much larger fraction of viral RNAs within the cell compared with  
89 what gets packaged, suggesting that IAV DelVGs are packaged much less efficiently than  
90 wild type genomic RNAs. While the magnitude of this effect varied somewhat between  
91 genome segments, we observed no significant differences in the sizes or locations of

92 packaged DelVG deletions compared with intracellular DelVGs, indicating that the  
93 bottleneck on DelVG packaging is not sequence-specific.

94

## 95 **RESULTS**

### 96 **Intracellular DelVGs generated early during infection are primarily derived from the 97 polymerase and HA segments**

98 Previous examinations of influenza DelVGs have looked specifically at the RNAs that get  
99 successfully packaged into virions (DIPs). It is not actually clear how well the packaged  
100 DelVGs observed within extracellular DIPs represent the total population of DelVGs  
101 produced by the IAV replication machinery. To better understand the full array of deletions  
102 commonly generated during IAV infection, and by extension the DelVG formation  
103 process, we examined the distributions of deletion breakpoints found within intracellular  
104 viral RNAs isolated early during infection.

105

106 We infected MDCK-SIAT1 cells at a multiplicity of infection (MOI) of 10 (based on Tissue  
107 Culture Infectious Dose (TCID<sub>50</sub>)) with a recombinant stock of A/Puerto Rico/8/1934  
108 (PR8) grown under conditions that minimize DIP content. We then harvested total cellular  
109 RNA at 3 and 6 hours post infection (hpi) in order to capture the intracellular DelVGs  
110 produced early during infection. We also extracted viral RNA from supernatants collected  
111 at 24 hpi to capture DelVGs that were successfully packaged into DIPs. These RNAs,  
112 along with genomic RNA extracted from the infecting viral stock, were used as templates  
113 for whole genome RT-PCR and next generation sequencing as we have previously  
114 described (17).

115

116 To focus our analysis on DelVGs that formed *de novo* during the experiment, we first  
117 defined the specific DelVGs present within the inoculum and excluded them from  
118 subsequent analyses (**Fig 1A**). We also only considered deletion junctions if they were  
119 represented by >5 reads within a given sample, a cutoff threshold that maximized junction  
120 detection albeit with reduced correlation between technical replicates (**Fig 1B**). We chose  
121 to prioritize junction detection sensitivity in this study due to the low copy number and  
122 read coverage of *de novo* generated DelVGs early during infection.

123

124 Using this approach, we identified hundreds of distinct DelVGs across all segments  
125 except M and NS, in both extracellular and intracellular samples. For each time point, we  
126 observed only partial overlap in the specific junctions shared between the three replicates,  
127 suggesting significant stochasticity in the specific locations at which deletions form (**Fig  
128 1C**). When we examined the proportional distribution of junctions across the eight  
129 genome segments, we found that these proportions were consistent across replicates,  
130 indicating significant and reproducible variation in the intrinsic potential of the individual  
131 genome segments to form DelVGs (**Fig 1D**). Numerous previous studies have shown that  
132 the majority of extracellular DelVGs found within DIPs are derived from the three  
133 polymerase segments, PB2, PB1, and PA (17, 21, 22). Interestingly, we observed that  
134 HA-derived DelVGs were roughly as numerous as polymerase-derived DelVGs at early  
135 timepoints within infected cells but only constituted a small fraction of extracellular  
136 DelVGs at 24 hpi, suggesting that population of DelVGs packaged into virions may not  
137 accurately reflect the relative abundances of DelVGs produced within infected cells.

138  
139

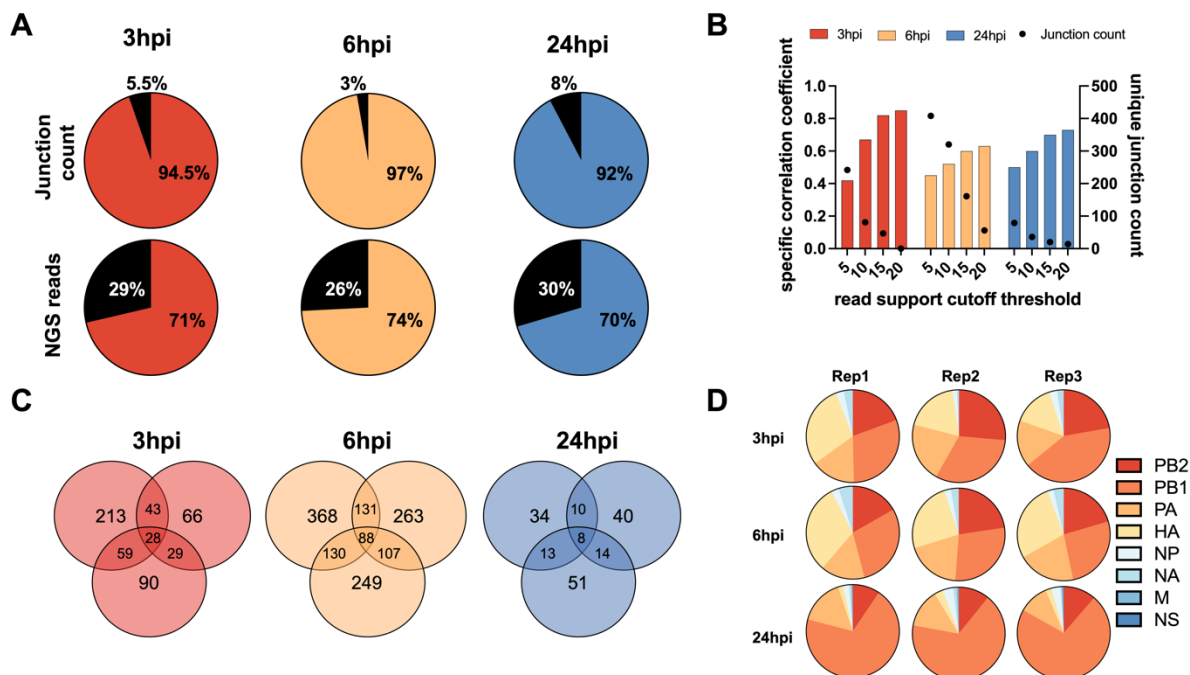

**Fig 1. DelVG formation is partially stochastic and biased towards the polymerase and HA segments. (A)** Pie charts show the percentages of the total normalized junction counts of all segments between the inoculum and viral populations from all time points at the levels of unique junction site (upper panel) and NGS reads (lower panel). The black fractions represent the junctions that were detected in the inoculum. **(B)** Correlation of distinct junctions in the PB2 segment between two technical replicate samples (generated from same RNA sample) using different NGS read cutoff values. **(C)** Venn diagram showing the overlap in specific junctions (for the PB2 segment) between three replicate samples collected at each time point. **(D)** Pie charts show the proportional abundance of normalized junction counts from each genome segment across replicates.

140  
141

### DelVG formation is not simply a function of segment length

It is not clear why some segments are more prone to DelVG formation than others, though it has been postulated that this is simply a function of the segment length (23). To directly test this hypothesis, we compared the normalized junction count between DelVGs detected at 6 hpi and a perfect model that assumes a positive correlation between junction count and the proportional length of each segment (**Fig 2A**). While the PB2 and PA segments matched up well with the model predictions, the other segments deviated significantly. These data demonstrate that rates of DelVG formation are not proportional to segment length.

151

### Direct sequence repeats and A/U bases are enriched at DelVG deletion junctions

By examining newly produced DelVGs isolated early during infection, we generated an unbiased view of DelVG deletion formation by the IAV replicase. Previous reports have described an enrichment of repeated sequences flanking DelVG deletions (termed “direct repeats”) and have hypothesized these direct repeats may promote DelVG formation by facilitating RNA-dependent RNA polymerase (RdRp) re-engagement during the replication process (15, 24). In support of these previous studies, we observed that deletions lacking direct repeat sequences were significantly less abundant, and a subset

159

160 of direct repeat sequence lengths were more abundant in early intracellular DeIVGs than  
 161 would be predicted if deletions were completely random (**Fig 2B**).  
 162

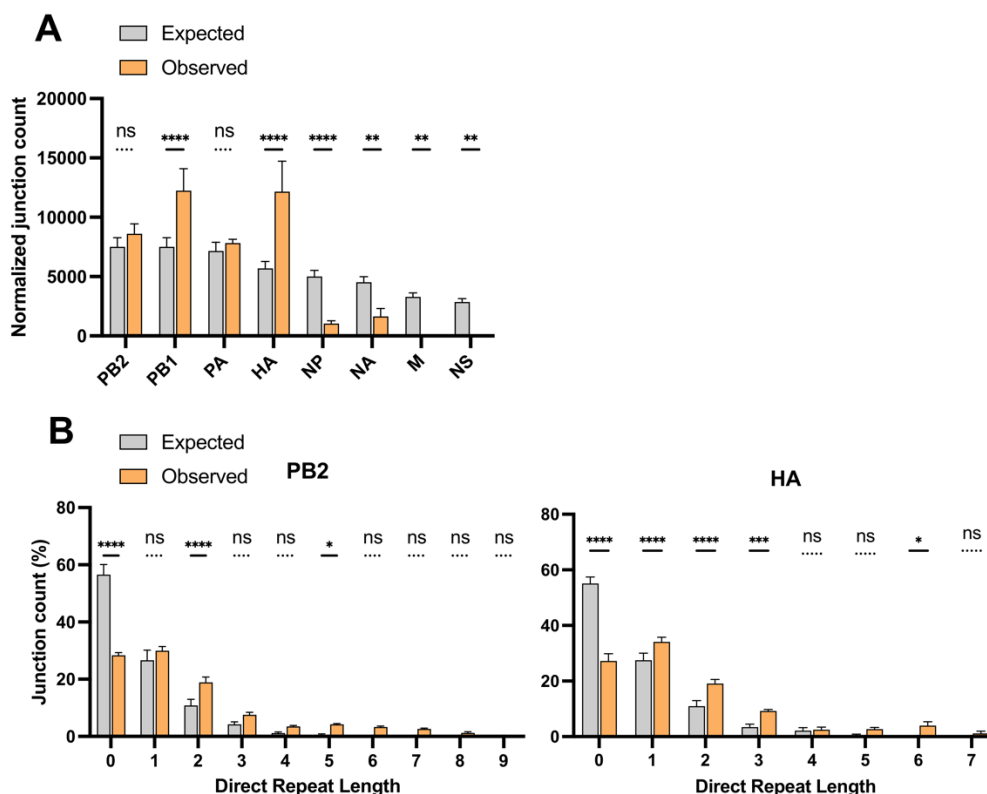

**Fig 2. Roles of segment length and direct repeat sequences in DeIVG deletion formation.** (A) Observed normalized junction counts per segment were compared with junction counts predicted by a model (expected) that assumes a simple positive correlation between segment length and DeIVG junction count (see materials and methods). (B) The numbers of DeIVG junctions detected at 6 hpi with no sequence repetition flanking the deletion breakpoints (Direct repeat length = 0), or with repeated sequences of varying length (Direct repeat length = 1-9) for the indicated segments (observed). Expected values plot the numbers of junctions with the indicated repeat lengths predicted from model simulations in which junction formation is random. Junction counts are plotted as a percentage of the total number of DeIVGs detected for a given segment. Data are presented as means ( $n = 3$  cell culture wells)  $\pm$  standard deviations. \*  $P < 0.05$ , \*\*  $P < 0.01$ , \*\*\*,  $P < 0.001$ ; \*\*\*\*,  $P < 0.0001$ , ns = not significant (Two-way ANOVA).

163  
 164  
 165 We also asked whether specific sequence motifs were enriched at DeIVG deletion  
 166 junctions. Using the 6 hpi samples, we extracted the sequences flanking each deletion  
 167 breakpoint in the pre-deletion, wild type sequence and calculated the proportion of each  
 168 nucleotide at each position (**Fig 3**). To determine whether the observed nucleotide  
 169 frequencies deviated from what would be expected if deletion formation was sequence  
 170 independent, we performed the same analysis on three replicate sets of deletions  
 171 randomly generated *in silico*. Comparison of the observed nucleotide frequencies with the  
 172 null model predictions revealed clear enrichment of adenosines or uridines at the 5'

173 deletion breakpoint position (labeled “J” in figure 3). We also detected enrichment of either  
 174 adenosines or uridines at the position immediately upstream of both the 5’ and 3’  
 175 breakpoints (position 4 in both R1 and R3). Finally, we observed enrichment of either  
 176 cytidines or guanosines within the R2 region downstream of the 5’ breakpoint. Altogether,  
 177 these results suggest that DelVG formation is facilitated in part by the presence of direct  
 178 sequence repeats and nucleotide composition surrounding the junction sites.  
 179

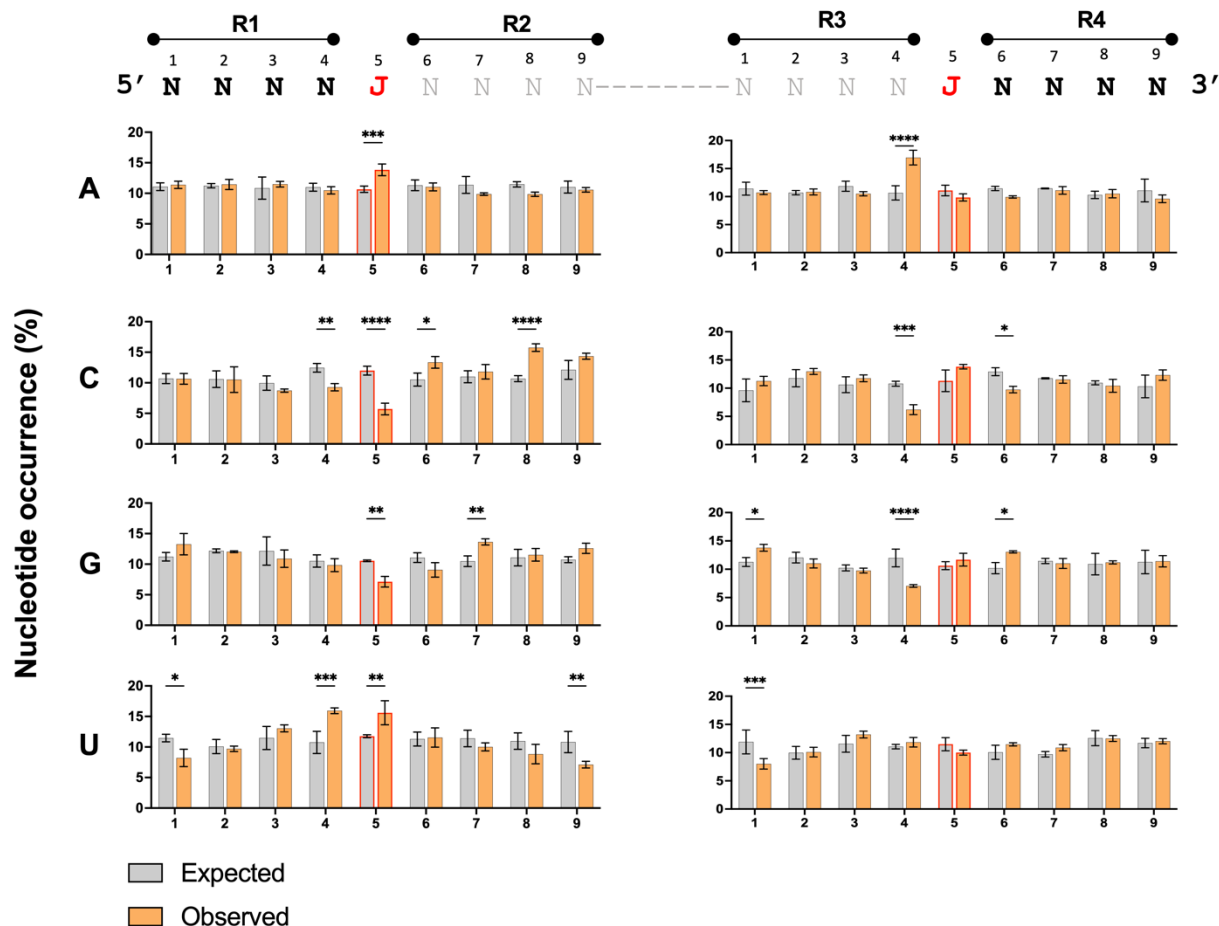

**Fig 3. Enrichment of specific nucleotides at positions flanking DelVG deletions.** The 4 nucleotides flanking DelVG junctions were numbered and divided into four regions (R1-R4) and the percentage occurrence of each nucleotide was calculated at each site within each region. The junction nucleotides immediately flanking the deletion are indicated by the red “J”s at position 5 on the left and right. The grey nucleotides flank the junctions in the progenitor sequence but are lost through deletion in the actual DelVG sequence. The percentage of nucleotide occurrence (observed in PB2 6 hpi) at each site was plotted against a random control (expected). Data are presented as means (n = 3 cell culture wells) ± standard deviations. \* P<0.05, \*\* P<0.01, \*\*\*, P < 0.001; \*\*\*\*, P < 0.0001 (Two-way ANOVA), ns = not significant.

180  
 181  
 182 **Intracellular DelVGs are inefficiently packaged**  
 183 Our finding that HA-derived DelVGs make up a large fraction of intracellular but not  
 184 extracellular DelVGs suggested that some DelVGs might be packaged into virions more  
 185 efficiently than others. To further investigate this, we compared both the normalized

186 numbers of unique junctions and read support for DelVGs from each segment between  
187 intracellular (3 and 6 hpi) and extracellular (24 hpi) populations (**Fig 4A**).  
188

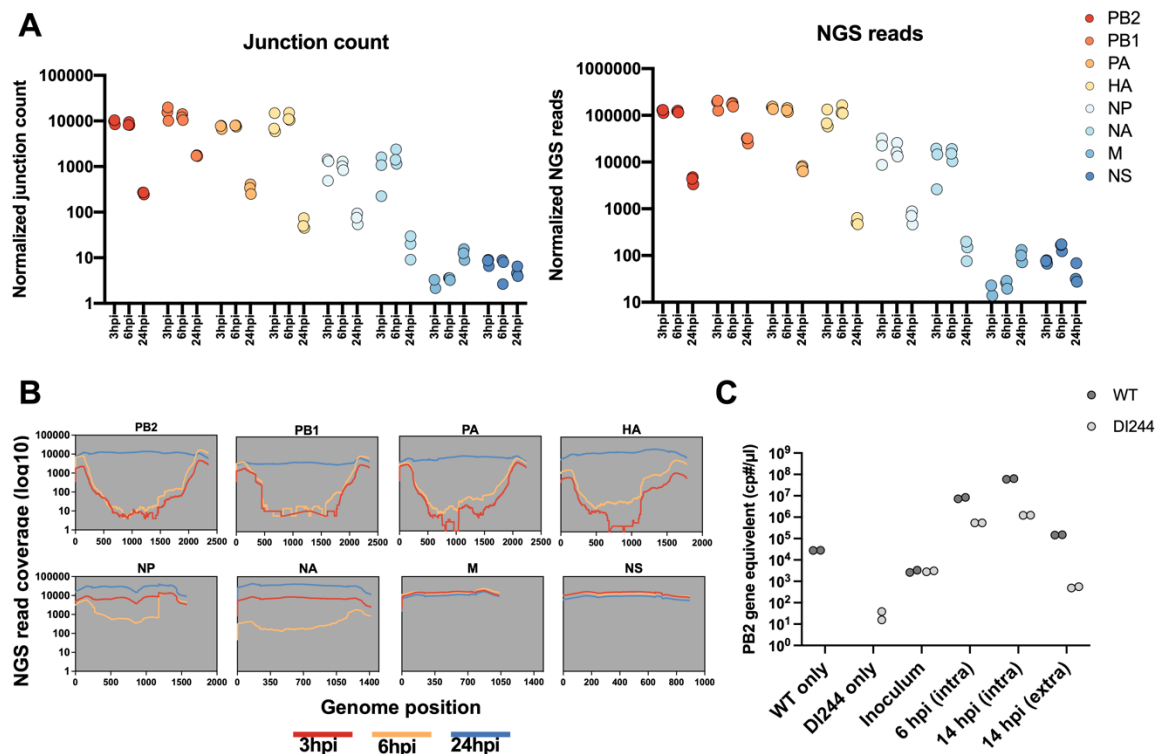

**Fig 4. DelVGs are inefficiently packaged compared with wild type vRNAs.** (A) Numbers of DelVG junction counts (left panel) and NGS reads (right panel) were counted for three replicates at each indicated time point, normalized to 106 mapped reads. Each dot represents a replicate. (B) The NGS read coverage per nucleotide was plotted for each segment at each time point (the average coverage of the three replicates per position). (C) Competition between WT and DI244 PB2 segments during infection and packaging. MDCK-SIAT1 cells were co-infected with WT PR8 and DI244 at a 1:1 ratio to a final MOI of 20 PB2 gene equivalents/cell under single cycle conditions. Absolute copy numbers of WT and DI244 PB2 segments were quantified in by RTqPCR within either cell lysates (intracellular), supernatant (extracellular), or inoculum mixture at the indicated timepoints post-infection. PR8-only and DI244 only controls are also shown. Data represent absolute values from individual cell culture wells and are representative of two independent experiments.

189  
190  
191 While normalized DelVG junction count numbers were highly similar for individual  
192 segments between 3 hpi and 6 hpi, we observed a 10-100 fold decrease in normalized  
193 junction counts by 24 hpi for segments 1-6 (**Fig 4A, left panel**). The same trend was also  
194 observed when we compared DelVG read support across timepoints (**Fig 4A, right**  
195 **panel**). These data suggested that DelVGs constitute a much smaller proportion of viral  
196 RNAs packaged into virions, compared with what is present within the infected cell.

197  
198 To confirm this observation, we examined the per-nucleotide read coverage for each  
199 segment. Since DelVGs are missing large internal regions of the genomic RNA sequence  
200 but still retain the segment termini, they produce a characteristic “devil horns” read  
201 coverage pattern, where read coverage is substantially lower in the middle of gene  
202 segment compared with the termini (25). This pattern was obvious in intracellular samples  
203 from 3 hpi and 6 hpi for segments 1-4, to a lesser extent for segments 5 and 6, and absent  
204 from segments 7 and 8, all consistent with the observed variation in abundances of

205 DelVGs associated with each segment (**Fig 4B**). In contrast, read coverage was  
206 consistent across the length of all eight segments in extracellular samples from 24 hpi,  
207 suggesting that DelVGs are much less abundant within this population of viral RNA.  
208

209 To directly quantify the relative packaging efficiencies of DelVGs and WT vRNAs, we  
210 performed an *in vitro* competition assay between WT PR8 and a recombinant stock of  
211 DI244, a well characterized DIP/DelVG that harbors a 1946 nucleotide internal deletion  
212 in the PB2 segment (26, 27), using qPCR primer/probe-sets specific for either the WT or  
213 DI244 versions of the PB2 gene segment (**Fig 4C**). We co-infected MDCK-SIAT1 cells  
214 with a 1:1 ratio (based on PB2 gene equivalents) of WT PR8 and DI244 at a combined  
215 MOI of 20 PB2 gene equivalents/cell under single cycle conditions where secondary  
216 spread was not permitted. We confirmed that the absolute copy numbers of both WT and  
217 DI244 PB2 gene equivalents present in the inoculum were equivalent using RTqPCR.  
218

219 Quantification of both WT- and DI244-derived PB2 genome equivalents within infected  
220 cells revealed that WT PB2 was ~50-fold more abundant than DI244 PB2 by 14 hpi,  
221 indicating that the WT PB2 segment enjoyed a significant replicative advantage over  
222 DI244. Quantification of extracellular RNA at the same timepoint (14 hpi) revealed an  
223 even more pronounced, ~280-fold advantage for the WT PB2 segment compared with  
224 DI244 (**Fig 4C**). Collectively, these data suggest that DelVGs make up a much smaller  
225 fraction of viral RNAs that get packaged into virions compared with what is present within  
226 the infected cell, consistent with a packaging defect relative to WT vRNAs.  
227

### 228 **No significant differences in deletion breakpoints between intracellular and** 229 **packaged DelVGs**

230 The discrepancies in both proportional abundance and distribution amongst the segments  
231 that we observed between intracellular and extracellular DelVGs suggested the existence  
232 of a significant bottleneck limiting packaging of DelVGs relative to wild type vRNAs. We  
233 hypothesized that this might be due to the potential loss of sequences required for efficient  
234 packaging during the formation of some DelVGs. If true, we expected that specific regions  
235 of gene segments required for maximal packaging efficiency would be retained within  
236 packaged extracellular DelVGs, but largely missing from intracellular DelVGs.  
237

238 To test this, we first examined the positions of deletion junctions from intracellular (6hpi)  
239 and extracellular (24 hpi) DelVGs (**Fig 5A**). As we and others have previously reported  
240 for packaged extracellular DelVGs, deletion junctions from both populations clustered  
241 within clear hot spots near the segment termini (25, 28, 29). The extracellular DelVG  
242 junction distribution appeared narrower than that of the 6 hpi intracellular DelVGs, but  
243 that could be an artifact of the greater overall abundance of intracellular DelVGs. To more  
244 rigorously evaluate whether the locations of deletion junctions differed between  
245 intracellular and extracellular DelVGs, we used a cumulative score method that allowed  
246 us to examine the proportional distribution of deletion junctions as a function of nucleotide  
247 position (**Fig 5B**). This approach clearly demonstrated that the distribution of deletions is  
248 statistically indistinguishable between intracellular and extracellular DelVGs ( $P=0.9$ ; t-  
249 test), suggesting that DelVGs that retain specific features or sequences are not selected  
250 for during the packaging process. Finally, we asked whether the sizes of DelVGs varied



251 between the three time points tested and again found no significant difference ( $p=0.57$ ; t-  
252 test) (**Fig 5C**), indicating that DeIVG size is not a determinant of packaging efficiency.  
253

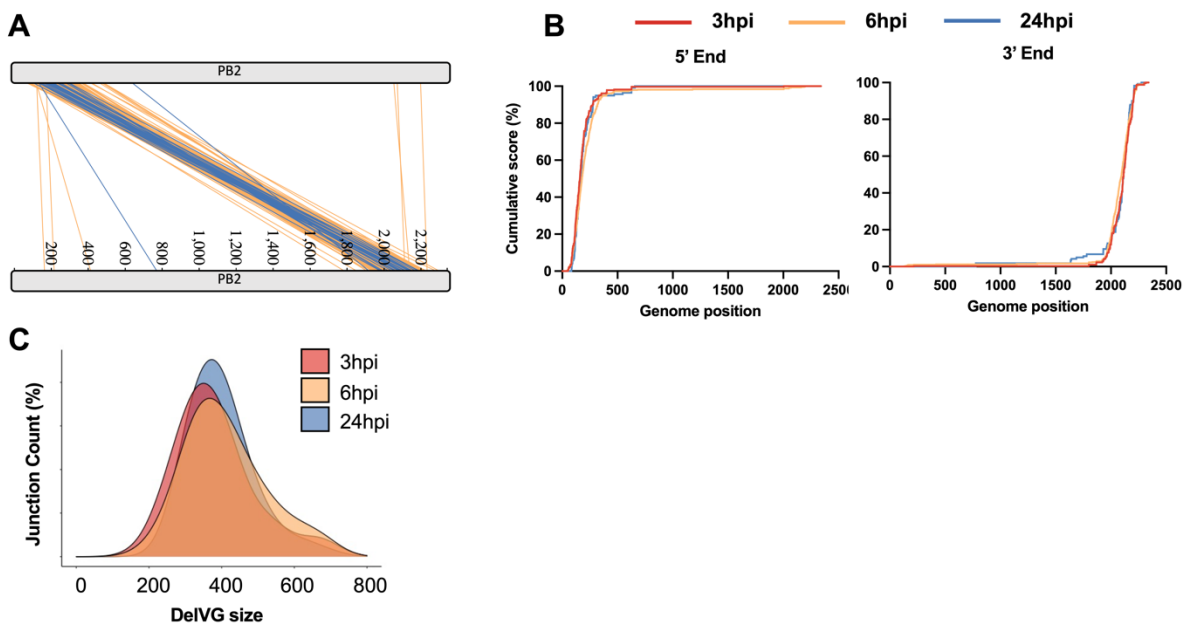

**Fig 5. No differences in deletion size or breakpoint locations between intracellular and packaged DeIVGs.** (A) PB2 DeIVG deletion junction sites at 6 and 24 hpi were mapped to the genome position with each line representing a distinct deletion and the colors indicating the time point (orange = 6 hpi, blue = 24 hpi). (B) Plots show the cumulative occurrence of DeIVG deletions as a function of gene segment position. Cumulative score was calculated by starting at zero at the end of the segment and then adding a score of 1 at each nucleotide where a unique junction breakpoint occurred. Scores were normalized by calculating the percentage of final value reached at each position. (C) DeIVG size distributions (PB2 segment only shown) from samples collected at the indicated time points were plotted using R density plot (ggplot package). The area under the curve is equal to 100 percent of all probabilities.

254  
255

## 256 DISCUSSION

257 Despite recent improvements in our fundamental understanding of the structure and  
258 function of the IAV polymerase complex, we still don't know how or why DeIVGs and DIPs  
259 form during IAV replication (11, 30–33). Here, we used a robust combined NGS/analysis  
260 pipeline to analyze the first wave of DeIVGs that form within cells during infection, thus  
261 providing the first unbiased view of *de novo* DeIVG production by the IAV replicase. We  
262 compared these intracellular DeIVGs to the population of DeIVGs that get packaged into  
263 virions, revealing a significant bottleneck in DeIVG packaging relative to wild type vRNAs.  
264 Our data contradict to the dogma that DeIVGs outcompete wild type vRNAs for packaging  
265 and suggest that the accumulation of DIPs within IAV populations must occur through  
266 other mechanisms.

267  
268 In agreement with previous studies, we found that the majority of extracellular DeIVGs  
269 junctions were derived from the three polymerase segments (24). Within intracellular  
270 DeIVG populations however, the abundance of HA-derived DeIVGs was comparable to  
271 that of the polymerase-derived DeIVGs, suggesting that DeIVGs from segments 1-4 are  
272 generated at similar rates but that the HA segment packaging efficiency is much more  
273 sensitive to deletions than the polymerase segments. It has been suggested that this bias  
274 in DeIVG formation across the segments is a function of segment length, potentially

275 because DelVGs derived from longer segments have a greater length differential  
276 compared with their wild type parents, resulting in a more pronounced replication  
277 advantage (3, 34). Our findings that the enrichment of DelVGs from segments 1-4 is  
278 already apparent by 3 hpi, suggests that this bias is emerging from the formation process  
279 rather than replication. More work is needed to identify the specific determinant(s) that  
280 influence the uneven distribution of DelVG formation across genome segments.

281  
282 DelVG formation is thought to occur when the viral replicase pauses synthesis of the  
283 daughter vRNA or cRNA but continues processing along the template and re-initiates  
284 synthesis at a downstream site on the same template (3, 35). This process is not  
285 completely random, as the vast majority of deletions start and stop within hotspots near  
286 the segment termini, and individual segments vary greatly in DelVG formation (24, 25,  
287 36). We observed the same distribution in intracellular DelVGs, indicating that these  
288 hotspots reflect that what is produced by the viral RdRp and are not biased by selection  
289 in the packaging process. Altogether, our data suggest that specific regions of the viral  
290 genome are uniquely prone to DelVG formation, for reasons that are still not understood.

291  
292 It has been suggested that the polymerase translocation is promoted by the presence of  
293 a direct sequence repeat and a specific nucleotide composition at the junction site (6, 15,  
294 24). We demonstrate significant enrichment of direct sequence repeats and A/U  
295 nucleotides at DelVG deletion junctions, along with C/G nucleotides downstream of the  
296 5' deletion breakpoint. Interestingly some of these nucleotides are located within the  
297 regions that are not retained in DelVG final product (R2 and R3 in Fig 3), suggesting  
298 possible roles for the sequence composition both upstream and downstream of junction  
299 sites at both ends of the viral genome. These specific template sequence features likely  
300 enhance the probability of RdRp translocation occurring, however these features are not  
301 absolutely required, as large numbers of DelVG junctions that lack flanking direct repeats  
302 or A/U bases can easily be observed. There also appears to be a significant degree of  
303 stochasticity in the specific nucleotides at which deletions form, based on the limited  
304 degree of overlap in breakpoint locations between replicates.

305  
306 DelVGs/DIPs are known for their ability to inhibit the replication of WT virus, and it is  
307 widely believed that this effect is partially driven by DelVGs outcompeting WT vRNAs for  
308 packaging (37). Our data strongly suggest that the opposite is true: that DelVGs are  
309 inefficiently packaged into virions compared with WT vRNAs. This finding complicates our  
310 understanding of how DIPs outcompete WT virus at the population level, suggesting that  
311 other advantages must help DelVGs/DIPs offset their packaging deficiencies.

312  
313 Given the similar characteristics of deletions between intracellular and extracellular  
314 DelVG populations, it appears that the effects of DelVG-associated deletions on  
315 packaging efficiency are independent of deletion size or location. Our data suggest that  
316 all DelVGs generated by the IAV RdRp are lacking some determinant required for  
317 maximal packaging. IAV genome packaging is governed by multiple, discontinuous  
318 regions that act in *cis* and in *trans* to facilitate the efficient and selective incorporation of  
319 a single copy of each genome segment into the vast majority of virions (29). Each  
320 segment contains packaging and bundling sequences that span both coding and non-

321 coding regions of the segment termini (38–42). Beyond the well-described packaging  
322 signals in the segment termini, additional packaging determinants exist within the interiors  
323 of some segments (43–46). We observed no enrichment of DeIVGs that retained longer  
324 stretches of the segment termini, suggesting the decreased efficiency of DeIVG  
325 packaging is due to the loss of internal packaging determinants.

326  
327 Our analysis of the initial wave of DeIVGs produced *de novo* during IAV infection provides  
328 critical insights into the formation and packaging of both DeIVGs and WT RNAs. This  
329 approach generated a detailed portrait of the full range of DeIVG produced by the IAV  
330 replicase, allowing us to show that DeIVGs are inefficiently packaged into particles  
331 relative to WT, contrary to dogma. Additionally, we showed that DeIVG formation is not  
332 influenced by the segment length and partially influenced by sequence context. Several  
333 fundamental questions remain, however, including the specific mechanism that triggers  
334 DeIVG formation and the factors that cause DeIVGs to only form at defined hotspots and  
335 in higher frequency within some segments than the others.

336

## 337 **MATERIALS AND METHODS**

### 338 **Virus and cells**

339 MDCK-SIAT1 and HEK293T cells were grown in minimal essential medium (MEM) plus  
340 GlutaMax (Gibco), supplemented with 8.3% fetal bovine serum (Seradigm), at 37°C and  
341 5% CO<sub>2</sub>. Recombinant A/Puerto Rico/8/1934 (PR8) was generated from HEK293T cells  
342 through standard influenza virus 8-plasmid reverse genetics transfection. Undiluted  
343 transfection supernatants were directly inoculated onto MDCK-SIAT1 cells, and  
344 supernatants were harvested at first signs of cytopathic effect (CPE) to generate seed  
345 stocks. Working stocks of virus were generated by infecting MDCK-SIAT1 cells with seed  
346 stock at an MOI of 0.0001 TCID<sub>50</sub>/cell and harvesting 48 hpi. Supernatant was clarified  
347 at 3000 RPM for 5 minutes and 500 µL aliquots were stored at -70°C.

348

### 349 **Generation of DeIVG through high MOI infection**

350 Confluent MDCK-SIAT1 were infected in triplicate with PR8 at an MOI of 10 TCID<sub>50</sub>/cell.  
351 To harvest intracellular viral RNA at 3 and 6 hpi, cells were washed twice with PBS, and  
352 RNA was extracted using the QIAgen RNeasy kit following the manufacturer's  
353 instructions. To extract extracellular RNA from packaged virions, supernatant was  
354 collected from infected cells at 24 hpi. After clarification, 140µl of supernatant was used  
355 for RNA extraction using the Qiagen QIAamp viral RNA mini kit per the manufacturer's  
356 instructions. All RNA was stored at -70°C.

357

### 358 **Viral cDNA amplification and sequencing**

359 Universal RT-PCR was performed on all the samples using a previously described  
360 method (17, 47). Briefly, 3µL of RNA was mixed with 1µL (2µM) MBTUni-12 primer + 1µL  
361 (10µM) dNTPs + 8µL dH<sub>2</sub>O. Reactions were incubated as previously described, and  
362 finally 1µL SuperScript III RT (Invitrogen), 4µL of 5X First-Strand Buffer, 1µL of DTT, 1µL  
363 RNase-in (Invitrogen) were added before the final incubation. From this, 5µl was used  
364 with 2.5µL (10µM) of each universal primer, 0.5µL Phusion polymerase (NEB), 10µL - 5x  
365 HF buffer, 1µL (10mM dNTPs mix), and 28.5µL dH<sub>2</sub>O. The PCR conditions used were  
366 98°C (30 s) followed by 25 cycles of 98°C (10 s), 57°C (30 s), and 72°C (90 s); a terminal

367 extension of 72°C (5 min); and a final 10°C hold. Finally, PCR amplicons were purified  
368 using the Qiagen QIAquick PCR Purification Kit and sequenced with paired-ends 2x250nt  
369 reads on an Illumina MiSeq using V2 chemistry (17).

370

#### 371 **Generation of recombinant DI244**

372 We synthesized (Integrated DNA technologies, Inc.) and cloned the full-length DI244  
373 sequence (NCBI # L41510.1) into the pDZ vector and transfected it along with 7 plasmids  
374 encoding WT versions of segments 2-8 plasmids into PB2-expressing HEK293 cells  
375 (HEK293-PB2), using the standard 8-plasmid reverse genetics approach. Briefly, 60 to  
376 90% confluent PB2-expressing HEK293 cells were transfected with 500 ng of various  
377 plasmids (pDZ::PB2-DI244, pDZ::PB1, pDZ::PA, pDZ::HA, pDZ::NP, pDZ::NA, pDZ::M,  
378 and pDZ::NS) by using JetPrime (Polyplus) according to the manufacturer's instructions.  
379 Under these conditions, no WT virus is generated due to the absence of WT PB2  
380 segment. Transfection supernatant was used to infect PB2-expressing MDCK cells  
381 (MDCK-PB2) for 48 hrs to generate a seed stock. HEK293-PB2 and MDCK-PB2 cells  
382 were kindly provided by Dr. Stefan Pöhlmann and are described in this reference  
383 (5). DI244 seed stock was titered on MDCK-PB2 cells and used to infect MDCK-PB2 cells  
384 at an MOI of 0.001 TCID<sub>50</sub>/cell for 72 hrs to generate a working stock. Deep sequencing  
385 of the DI244 working stock confirmed the presence of the expected DI244 deletion  
386 junction and the absence of WT PB2 segment (data not shown).

387

#### 388 **RTqPCR quantification of DI244 and WT PB2 gene segments**

389 We designed and optimized specific primer/probesets (**Table S1**) specific for either DI244  
390 or WT PB2 using the IDT PrimerQuest webtool and validated efficiency and specificity  
391 using serial dilutions of plasmids encoding either WT PB2 or DI244. Viral RNA was  
392 extracted from cells or virions as described above and used to synthesize cDNA using  
393 the universal primer described above and Verso cDNA synthesis Kit (Thermo Fisher). 3µl  
394 of RNA was mixed with 8µl H<sub>2</sub>O, 4µl 5X cDNA Synthesis Buffer, 2µl dNTP Mix (5 mM  
395 each), 1µl universal primer (10µM), 1µl RT Enhancer, 1µl Verso Enzyme Mix, before  
396 incubating for 50 minutes at 45°C. After this, 1µl of the of cDNA product was mixed with  
397 7µl H<sub>2</sub>O, 1µl forward primers (18µM), 1µl reverse primer (18µM), 1µl specific probe (5µM),  
398 and 10µl TaqMan Fast Advanced Master Mix (Thermo Fisher). The qPCR conditions used  
399 were: 50°C (2min), 95°C (2 min), followed by 40 cycles of 95°C (1 s) and 61°C (20 s) using  
400 a qPCR QuantStudio 3 thermocycler.

401

#### 402 **Table S1: qPCR primers and probes used for the competition assay**

403

| Primer/probe names                      | Sequence                 | Dye                        |
|-----------------------------------------|--------------------------|----------------------------|
| PB2-WT FW-primer (920-940)              | TTAGGCAGAACCCAACAGAAG    |                            |
| PB2-WT reverse-primer (1040-1020)       | ACTGATGATCCGCTTGTCTC     |                            |
| PB2-WT Probe (956-979)                  | TATGCAAGGCTGCAATGGGACTGA | 5'Yakima yellow/ZEN/3'IBFQ |
| PB2-DI244 forward-primer (92-109)       | AAACCACCGTGGACCATA       |                            |
| PB2-DI244 Reverse-primer (2169-2148)    | GCTCAGTTCATTGATGCTTAGT   |                            |
| PB2-DI244 Probe (135-151 and 2098-2103) | AGGAAGACAGGAGAAGACTGAGG  | 5'FAM/ZEN/3'IBFQ           |

404

#### 405 ***In vitro* competition assay**

406 MDCK-SIAT1 cells were coinfecting in duplicate at an MOI of 10 PB2 gene  
407 equivalents/cell with a 1:1 ratio of WT PR8 and DI244 (ratio based on PB2 gene

408 equivalents). Fractions of the inoculum mixture both before (0 hpi) and after the 1 hour  
409 adsorption phase were set aside for RTqPCR. After adsorption for 1 hour at 4°C, inoculum  
410 was removed, cells were washed, and MEM+FBS was added to cells. At 3 hpi,  
411 neutralizing anti-HA monoclonal antibody H36-26 was added to each well to a final  
412 concentration of 25ug/mL to block secondary spread. Cellular RNA was extracted from  
413 duplicate wells of cells at 6 hpi and at 14hpi using the QIAgen RNeasy kit following the  
414 manufacturer's instructions. At the 14hpi timepoint, viral RNA was also collected from  
415 supernatants using the Qiagen QIAamp viral RNA mini kit per the manufacturer's  
416 instructions. Control infections with only WT PR8 or only DI244 were also performed in  
417 parallel.

### 418 419 **Sequencing analysis of deletion junctions**

420 Raw sequencing reads were fed into our DI-detection pipeline for junction detection and  
421 characterization (17). Briefly, the pipeline uses set of algorithms including Bowtie (48) and  
422 ViReMa (49) to perform two major steps. First, filtering the NGS reads based on quality  
423 and origin (i.e. cellular or viral). Second, mapping and detecting the deletion junction and  
424 reporting the start and end sites for each junction in each gene segment, along with the  
425 number of NGS reads detected for each junction. The pipeline is accessible at:  
426 <https://github.com/BROOKELAB/Influenza-virus-DI-identification-pipeline>. NCBI  
427 accession numbers for the PR8 reference genome used in this study: PB2=AF389115.1,  
428 PB1=AF389116.1, PA=AF389117.1, HA=AF389118.1, NP=AF389119.1,  
429 NA=AF389120.1, M=AF389121.1, NS= AF389122.1

430  
431 To account for sequencing read coverage variations between libraries, we normalized the  
432 junction count and their NGS reads to  $10^6$  mapped reads per library per segment. For the  
433 junction count, the number of junctions per segment was multiplied by  $10^6$  and divided by  
434 the number of NGS reads aligned to the WT gene of the given segment in a given library.  
435 The same was done to normalize for the NGS reads, where the junctions' read number  
436 per segment was multiplied by  $10^6$  and divided by the number of NGS reads aligned to  
437 the WT genome of the given segment plus the number of reads mapped to the junctions.

438  
439 The direct repeat sequence lengths were extracted from the output file  
440 "Virus\_Recombination\_Results.txt" generated by ViReMa algorithm. For the random  
441 control, the junction sites were randomized using Excel function "=RANDBETWEEN()" based  
442 on the actual sequence range and number detected in the 6 hpi population. Next,  
443 a custom Perl code was used to extract their sequences from the corresponding PR8  
444 gene segment (PB2 and HA). Finally, the direct repeat lengths were extracted and  
445 compared to the real samples.

446  
447 To analyze the nucleotide composition at the junction site, we analyzed the sequences  
448 flanking the junction sites for enrichment of specific nucleotides. There are four possible  
449 sequence regions that possibly involved in promoting the polymerase translocation, two  
450 regions flanking the junction from each site, we numbered them region 1-4 (**Fig 3**). From  
451 these regions only, R 1& 4 are retained within the DeIVG final product, while R 2 & 3 are  
452 not, and their potential importance stems from their physical proximity to the junction. A  
453 custom Perl code was used to extract 4 nucleotides plus the junction from each region  
454 from all the detected DeIVG in the three replicates of the 6 hpi population. Next the

455 WebLogo platform (50) was used to measure the percentage occurrences of each  
456 nucleotide at each position. To decide whether the percentage occurrence differed from  
457 what would be expected in the absence of nucleotide enrichment, we generated a random  
458 control samples the same way as in the direct repeats. Finally, the two samples:  
459 observed/experimental and expected/computational were compared using Anova Two-  
460 way. To confirm the validity of this approach we found the same results when repeated  
461 the analysis for 3 hpi time point and different segments. Additionally, we found no  
462 significant difference at all nucleotide position upon comparing two random samples,  
463 three replicates each (data not shown).

464  
465 The percentage length of each segment was calculated based on the total genome length  
466 13585nts (e.g. PB2=17.2% and NS=6.5%). Next, the percentage length of each segment  
467 was used to calculate the number of junctions per segment based on the total normalized  
468 number of junctions of each sample (expected). Finally, these values were compared to  
469 the observed values from the actual experiments.

#### 471 **Data availability**

472 All NGS data sets generated in this study can be found under BioProject accession  
473 number PRJNA725907.

#### 475 **Acknowledgment**

476 We are grateful to other members of the lab for helpful comments and critical readings of  
477 the manuscript, as well as to Dr. Tanja Laske from Max Planck Institute and Dr. Perna  
478 Arora from Georg-August-University Göttingen for helpful discussion. This work was  
479 generously funded by the Defense Advanced Research Projects Agency under contract  
480 DARPA-16-35-INTERCEPT-FP-018. A.t.V. is supported by a joint Wellcome Trust and  
481 Royal Society grant 206579/Z/17/Z.

#### 484 **REFERENCES**

- 485 1. Brooke CB. 2017. Population Diversity and Collective Interactions during Influenza  
486 Virus Infection. *J Virol* 91.
- 487 2. Brooke CB, Ince WL, Wrammert J, Ahmed R, Wilson PC, Bennink JR, Yewdell JW.  
488 2013. Most influenza A virions fail to express at least one essential viral protein. *J*  
489 *Virol* 87:3155–3162.
- 490 3. Vignuzzi M, López CB. 2019. Defective viral genomes are key drivers of the virus-  
491 host interaction. *Nat Microbiol* 4:1075–1087.
- 492 4. Dimmock NJ, Easton AJ. 2014. Defective interfering influenza virus RNAs: time to  
493 reevaluate their clinical potential as broad-spectrum antivirals? *J Virol* 88:5217–  
494 5227.
- 495 5. Bdeir N, Arora P, Gärtner S, Hoffmann M, Reichl U, Pöhlmann S, Winkler M. 2019.  
496 A system for production of defective interfering particles in the absence of  
497 infectious influenza A virus. *PLoS ONE* 14:e0212757.

- 498 6. Nayak DP, Chambers TM, Akkina RK. 1985. Defective-Interfering (DI) RNAs of  
499 Influenza Viruses: Origin, Structure, Expression, and Interference, p. 103–151. *In*  
500 Cooper, M, Eisen, H, Goebel, W, Hofschneider, PH, Koprowski, H, Melchers, F,  
501 Oldstone, M, Rott, R, Schweiger, HG, Vogt, PK, Wilson, I (eds.), *Current Topics in*  
502 *Microbiology and Immunology*. Springer, Berlin, Heidelberg.
- 503 7. Laske T, Heldt FS, Hoffmann H, Frensing T, Reichl U. 2016. Modeling the  
504 intracellular replication of influenza A virus in the presence of defective interfering  
505 RNAs. *Virus Research* 213:90–99.
- 506 8. Felt SA, Sun Y, Jozwik A, Paras A, Habibi MS, Nickle D, Anderson L, Achouri E,  
507 Feemster KA, Cárdenas AM, Turi KN, Chang M, Hartert TV, Sengupta S, Chiu C,  
508 López CB. 2021. Detection of respiratory syncytial virus defective genomes in  
509 nasal secretions is associated with distinct clinical outcomes. *Nat Microbiol*  
510 <https://doi.org/10.1038/s41564-021-00882-3>.
- 511 9. Vasilijevic J, Zamarreño N, Oliveros JC, Rodriguez-Frandsen A, Gómez G,  
512 Rodriguez G, Pérez-Ruiz M, Rey S, Barba I, Pozo F, Casas I, Nieto A, Falcón A.  
513 2017. Reduced accumulation of defective viral genomes contributes to severe  
514 outcome in influenza virus infected patients. *PLOS Pathogens* 13:e1006650.
- 515 10. von Magnus P. 1954. Incomplete Forms of Influenza Virus, p. 59–79. *In* Smith, KM,  
516 Lauffer, MA (eds.), *Advances in Virus Research*. Academic Press.
- 517 11. Alnaji FG, Brooke CB. 2020. Influenza virus DI particles: Defective interfering or  
518 delightfully interesting? *PLoS Pathog* 16:e1008436.
- 519 12. Kupke SY, Riedel D, Frensing T, Zmora P, Reichl U. 2019. A Novel Type of  
520 Influenza A Virus-Derived Defective Interfering Particle with Nucleotide  
521 Substitutions in Its Genome. *Journal of Virology* 93.
- 522 13. Te Velthuis AJW, Long JC, Bauer DLV, Fan RLY, Yen H-L, Sharps J, Siegers JY,  
523 Killip MJ, French H, Oliva-Martín MJ, Randall RE, de Wit E, van Riel D, Poon LLM,  
524 Fodor E. 2018. Mini viral RNAs act as innate immune agonists during influenza  
525 virus infection. *Nat Microbiol* 3:1234–1242.
- 526 14. Boussier J, Munier S, Achouri E, Meyer B, Crescenzo-Chaigne B, Behillil S, Enouf  
527 V, Vignuzzi M, van der Werf S, Naffakh N. 2020. RNA-seq accuracy and  
528 reproducibility for the mapping and quantification of influenza defective viral  
529 genomes. *RNA* 26:1905–1918.
- 530 15. Lui W-Y, Yuen C-K, Li C, Wong WM, Lui P-Y, Lin C-H, Chan K-H, Zhao H, Chen H,  
531 To KKW, Zhang AJX, Yuen K-Y, Kok K-H. 2019. SMRT sequencing revealed the  
532 diversity and characteristics of defective interfering RNAs in influenza A (H7N9)  
533 virus infection. *Emerg Microbes Infect* 8:662–674.
- 534 16. Timm C, Akpinar F, Yin J. 2014. Quantitative characterization of defective virus  
535 emergence by deep sequencing. *J Virol* 88:2623–2632.

- 536 17. Alnaji FG, Holmes JR, Rendon G, Vera JC, Fields CJ, Martin BE, Brooke CB.  
537 2019. Sequencing Framework for the Sensitive Detection and Precise Mapping of  
538 Defective Interfering Particle-Associated Deletions across Influenza A and B  
539 Viruses. *Journal of Virology* 93.
- 540 18. Sun Y, Kim EJ, Felt SA, Taylor LJ, Agarwal D, Grant GR, López CB. 2019. A  
541 specific sequence in the genome of respiratory syncytial virus regulates the  
542 generation of copy-back defective viral genomes. *PLoS Pathog* 15:e1007707.
- 543 19. Genoyer E, López CB. 2019. Defective Viral Genomes Alter How Sendai Virus  
544 Interacts with Cellular Trafficking Machinery, Leading to Heterogeneity in the  
545 Production of Viral Particles among Infected Cells. *J Virol* 93.
- 546 20. Langsjoen RM, Muruato AE, Kunkel SR, Jaworski E, Routh A. 2020. Differential  
547 Alphavirus Defective RNA Diversity between Intracellular and Extracellular  
548 Compartments Is Driven by Subgenomic Recombination Events. *mBio* 11:e00731-  
549 20, [/mbio/11/4/mBio.00731-20.atom](https://doi.org/10.1128/mBio.00731-20).
- 550 21. Heterologous Protection of Mice from a Lethal Human H1N1 Influenza A Virus  
551 Infection by H3N8 Equine Defective Interfering Virus: Comparison of Defective  
552 RNA Sequences Isolated from the DI Inoculum and Mouse Lung | Elsevier  
553 Enhanced Reader.
- 554 22. Davis AR, Nayak DP. 1979. Sequence relationships among defective interfering  
555 influenza viral RNAs. *Proc Natl Acad Sci U S A* 76:3092–3096.
- 556 23. Nayak DP, Chambers TM, Akkina RK. 1985. Defective-interfering (DI) RNAs of  
557 influenza viruses: origin, structure, expression, and interference. *Curr Top Microbiol*  
558 *Immunol* 114:103–151.
- 559 24. Saira K, Lin X, DePasse JV, Halpin R, Twaddle A, Stockwell T, Angus B, Cozzi-  
560 Lepri A, Delfino M, Dugan V, Dwyer DE, Freiberg M, Horban A, Losso M, Lynfield  
561 R, Wentworth DN, Holmes EC, Davey R, Wentworth DE, Ghedin E. 2013.  
562 Sequence Analysis of In Vivo Defective Interfering-Like RNA of Influenza A H1N1  
563 Pandemic Virus. *Journal of Virology* 87:8064–8074.
- 564 25. Sequencing Framework for the Sensitive Detection and Precise Mapping of  
565 Defective Interfering Particle-Associated Deletions across Influenza A and B  
566 Viruses | *Journal of Virology*.
- 567 26. Noble S, Dimmock NJ. 1995. Characterization of putative defective interfering (DI)  
568 A/WSN RNAs isolated from the lungs of mice protected from an otherwise lethal  
569 respiratory infection with influenza virus A/WSN (H1N1): a subset of the inoculum  
570 DI RNAs. *Virology* 210:9–19.
- 571 27. Dimmock NJ, Easton AJ. 2015. Cloned Defective Interfering Influenza RNA and a  
572 Possible Pan-Specific Treatment of Respiratory Virus Diseases. *Viruses* 7:3768–  
573 3788.



- 574 28. Janda JM, Davis AR, Nayak DP, De BK. 1979. Diversity and generation of  
575 defective interfering influenza virus particles. *Virology* 95:48–58.
- 576 29. Hutchinson EC, von Kirchbach JC, Gog JR, Digard P. 2010. Genome packaging in  
577 influenza A virus. *Journal of General Virology*, 91:313–328.
- 578 30. te Velthuis AJW, Fodor E. 2016. Influenza virus RNA polymerase: insights into the  
579 mechanisms of viral RNA synthesis. *Nature Reviews Microbiology* 14:479–493.
- 580 31. Fodor E, te Velthuis AJW. 2020. Structure and Function of the Influenza Virus  
581 Transcription and Replication Machinery. *Cold Spring Harb Perspect Med*  
582 10:a038398.
- 583 32. Fan H, Walker AP, Carrique L, Keown JR, Serna Martin I, Karia D, Sharps J,  
584 Hengrung N, Pardon E, Steyaert J, Grimes JM, Fodor E. 2019. Structures of  
585 influenza A virus RNA polymerase offer insight into viral genome replication.  
586 *Nature* 573:287–290.
- 587 33. te Velthuis AJW, Grimes JM, Fodor E. 2021. Structural insights into RNA  
588 polymerases of negative-sense RNA viruses. *Nat Rev Microbiol*  
589 <https://doi.org/10.1038/s41579-020-00501-8>.
- 590 34. Frensing T. 2015. Defective interfering viruses and their impact on vaccines and  
591 viral vectors. *Biotechnology Journal* 10:681–689.
- 592 35. Furusawa Y, Yamada S, da Silva Lopes TJ, Dutta J, Khan Z, Kriti D, van Bakel H,  
593 Kawaoka Y. 2019. Influenza Virus Polymerase Mutation Stabilizes a Foreign Gene  
594 Inserted into the Virus Genome by Enhancing the Transcription/Replication  
595 Efficiency of the Modified Segment. *MBio* 10.
- 596 36. Jennings PA, Finch JT, Winter G, Robertson JS. 1983. Does the higher order  
597 structure of the influenza virus ribonucleoprotein guide sequence rearrangements  
598 in influenza viral RNA? *Cell* 34:619–627.
- 599 37. Duhaut SD, McCauley JW. 1996. Defective RNAs inhibit the assembly of influenza  
600 virus genome segments in a segment-specific manner. *Virology* 216:326–337.
- 601 38. Muramoto Y, Takada A, Fujii K, Noda T, Iwatsuki-Horimoto K, Watanabe S,  
602 Horimoto T, Kida H, Kawaoka Y. 2006. Hierarchy among Viral RNA (vRNA)  
603 Segments in Their Role in vRNA Incorporation into Influenza A Virions. *J Virol*  
604 80:2318–2325.
- 605 39. Goto H, Muramoto Y, Noda T, Kawaoka Y. 2013. The genome-packaging signal of  
606 the influenza A virus genome comprises a genome incorporation signal and a  
607 genome-bundling signal. *J Virol* 87:11316–11322.

- 608 40. Fujii Y, Goto H, Watanabe T, Yoshida T, Kawaoka Y. 2003. Selective incorporation  
609 of influenza virus RNA segments into virions. *Proceedings of the National Academy*  
610 *of Sciences* 100:2002–2007.
- 611 41. Marsh GA, Hatami R, Palese P. 2007. Specific residues of the influenza A virus  
612 hemagglutinin viral RNA are important for efficient packaging into budding virions. *J*  
613 *Virol* 81:9727–9736.
- 614 42. Gao Q, Palese P. 2009. Rewiring the RNAs of influenza virus to prevent  
615 reassortment. *Proc Natl Acad Sci U S A* 106:15891–15896.
- 616 43. Dadonaite B, Gilbertson B, Knight ML, Trifkovic S, Rockman S, Laederach A,  
617 Brown LE, Fodor E, Bauer DLV. 2019. The structure of the influenza A virus  
618 genome. *Nat Microbiol* 4:1781–1789.
- 619 44. Gavazzi C, Yver M, Isel C, Smyth RP, Rosa-Calatrava M, Lina B, Moules V,  
620 Marquet R. 2013. A functional sequence-specific interaction between influenza A  
621 virus genomic RNA segments. *Proceedings of the National Academy of Sciences*  
622 110:16604–16609.
- 623 45. Gilbertson B, Zheng T, Gerber M, Printz-Schweigert A, Ong C, Marquet R, Isel C,  
624 Rockman S, Brown L. 2016. Influenza NA and PB1 Gene Segments Interact during  
625 the Formation of Viral Progeny: Localization of the Binding Region within the PB1  
626 Gene. *Viruses* 8.
- 627 46. Noda T, Sugita Y, Aoyama K, Hirase A, Kawakami E, Miyazawa A, Sagara H,  
628 Kawaoka Y. 2012. Three-dimensional analysis of ribonucleoprotein complexes in  
629 influenza A virus. *Nature Communications* 3:639.
- 630 47. Single-Reaction Genomic Amplification Accelerates Sequencing and Vaccine  
631 Production for Classical and Swine Origin Human Influenza A Viruses | *Journal of*  
632 *Virology*.
- 633 48. Langmead B, Salzberg SL. 2012. Fast gapped-read alignment with Bowtie 2. 4.  
634 *Nature Methods* 9:357–359.
- 635 49. Routh A, Johnson JE. 2014. Discovery of functional genomic motifs in viruses with  
636 ViReMa—a Virus Recombination Mapper—for analysis of next-generation  
637 sequencing data. *Nucleic Acids Res* 42:e11.
- 638 50. Schneider TD, Stephens RM. 1990. Sequence logos: a new way to display  
639 consensus sequences. *Nucleic Acids Res* 18:6097–6100.

## 640 **FIGURE LEGENDS**

641 **Fig 1. DelVG formation is partially stochastic and biased towards the polymerase**  
642 **and HA segments. (A)** Pie charts show the percentages of the total normalized junction  
643 counts of all segments between the inoculum and viral populations from all time points at  
644 the levels of unique junction site (upper panel) and NGS reads (lower panel). The black

645 fractions represent the junctions that were detected in the inoculum. **(B)** Correlation of  
646 distinct junctions in the PB2 segment between two technical replicate samples (generated  
647 from same RNA sample) using different NGS read cutoff values. **(C)** Venn diagram  
648 showing the overlap in specific junctions (for the PB2 segment) between three replicate  
649 samples collected at each time point. **(D)** Pie charts show the proportional abundance of  
650 normalized junction counts from each genome segment across replicates.

651  
652 **Fig 2. Roles of segment length and direct repeat sequences in DelVG deletion**  
653 **formation.** **(A)** Observed normalized junction counts per segment were compared with  
654 junction counts predicted by a model (expected) that assumes a simple positive  
655 correlation between segment length and DelVG junction count (see materials and  
656 methods). **(B)** The numbers of DelVG junctions detected at 6 hpi with no sequence  
657 repetition flanking the deletion breakpoints (Direct repeat length = 0), or with repeated  
658 sequences of varying length (Direct repeat length = 1-9) for the indicated segments  
659 (observed). Expected values plot the numbers of junctions with the indicated repeat  
660 lengths predicted from model simulations in which junction formation is random. Junction  
661 counts are plotted as a percentage of the total number of DelVGs detected for a given  
662 segment. Data are presented as means (n = 3 cell culture wells)  $\pm$  standard deviations. \*  
663  $P < 0.05$ , \*\*  $P < 0.01$ , \*\*\*,  $P < 0.001$ ; \*\*\*\*,  $P < 0.0001$ , ns = not significant (Two-way  
664 ANOVA).

665  
666 **Fig 3. Enrichment of specific nucleotides at positions flanking DelVG deletions.** The  
667 4 nucleotides flanking DelVG junctions were numbered and divided into four regions (R1-  
668 R4) and the percentage occurrence of each nucleotide was calculated at each site within  
669 each region. The junction nucleotides immediately flanking the deletion are indicated by  
670 the red "J"s at position 5 on the left and right. The grey nucleotides flank the junctions in  
671 the progenitor sequence but are lost through deletion in the actual DelVG sequence. The  
672 percentage of nucleotide occurrence (observed in PB2 6 hpi) at each site was plotted  
673 against a random control (expected). Data are presented as means (n = 3 cell culture  
674 wells)  $\pm$  standard deviations. \*  $P < 0.05$ , \*\*  $P < 0.01$  \*\*\*,  $P < 0.001$ ; \*\*\*\*,  $P < 0.0001$  (Two-  
675 way ANOVA), ns = not significant.

676  
677 **Fig 4. DelVGs are inefficiently packaged compared with wild type vRNAs.** **(A)**  
678 Numbers of DelVG junction counts (left panel) and NGS reads (right panel) were counted  
679 for three replicates in each segment at each indicated time point, normalized to  $10^6$   
680 mapped reads. Each dot represents a replicate. **(B)** The NGS read coverage per  
681 nucleotide was plotted for each segment at each time point (the average coverage of the  
682 three replicates per position). **(C)** Competition between WT and DI244 PB2 segments  
683 during infection and packaging. MDCK-SIAT1 cells were co-infected with WT PR8 and  
684 DI244 at a 1:1 ratio to a final MOI of 20 PB2 gene equivalents/cell under single cycle  
685 conditions. Absolute copy numbers of WT and DI244 PB2 segments were quantified in  
686 by RTqPCR within either cell lysates (intracellular), supernatant (extracellular), or  
687 inoculum mixture at the indicated timepoints post-infection. PR8-only and DI244 only  
688 controls are also shown. Data represent absolute values from individual cell culture wells  
689 and are representative of two independent experiments.

690

691 **Fig 5. No differences in deletion size or breakpoint locations between intracellular**  
692 **and packaged DeIVGs. (A)** PB2 DeIVG deletion junction sites at 6 and 24 hpi were  
693 mapped to the genome position with each line representing a distinct deletion and the  
694 colors indicating the time point (orange = 6 hpi, blue = 24 hpi). **(B)** Plots show the  
695 cumulative occurrence of DeIVG deletions as a function of gene segment position.  
696 Cumulative score was calculated by starting at zero at the end of the segment and then  
697 adding a score of 1 at each nucleotide where a unique junction breakpoint occurred.  
698 Scores were normalized by calculating the percentage of final value reached at each  
699 position. **(C)** DeIVG size distributions (PB2 segment only shown) from samples collected  
700 at the indicated time points were plotted using R density plot (ggplot package). The area  
701 under the curve is equal to 100 percent of all probabilities.
